# Supplementary material for: Biochemical characterization of NADH:FMN oxidoreductase HcbA3 from Nocardioides sp. PD653 in catalyzing aerobic HCB dechlorination
Source: PubMed Central journal article supplement — J Pestic Sci. 2020 Aug 20;45(3):125–31. doi: 10.1584/jpestics.D20-23 (PMC7453296; doi:10.1584/jpestics.d20-23), 2020-08-20
Supplement: jps-45-3-D20-23_s001.pdf [file jps-45-3-D20-23_s001.pdf]

# Journal of Pesticide Science

supplementary materials

DOI:10.1584/jpestics.D20-023

**Biochemical characterization of NADH:FMN oxidoreductase HcbA3  
from *Nocardioides* sp. PD653  
in catalyzing aerobic HCB dechlorination**

Koji ITO, Kazuhiro TAKAGI, Ryota KATAOKA and Hiromasa KIYOTA

Pesticide Science Society of Japan

*<http://pssj2.jp/eng/>*

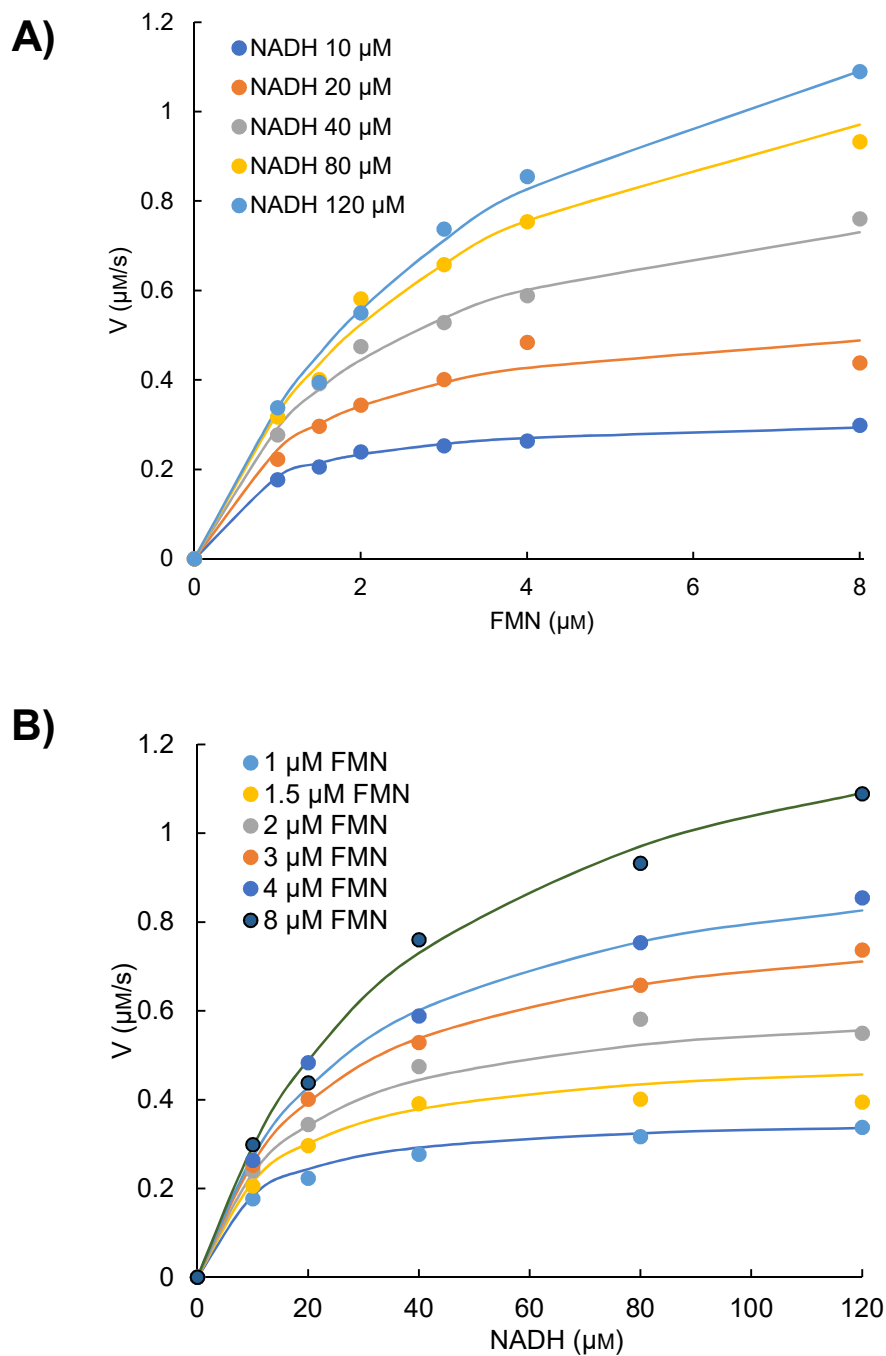

**Fig. S1 Steady-state kinetics of HcbA3C-His.** Reactions of HcbA3C-His (25 nM) with various concentration of NADH and FMN as the electron donor and acceptor, respectively were performed in 25 mM KP; pH 7.5 at room temperature. Direct plots of initial rate versus NADH (A) and FMN (B) concentrations were shown, respectively.
